# Supplementary material for: Dyserythropoiesis evaluated by the RED score and hepcidin:ferritin ratio predicts response to erythropoietin in lower-risk myelodysplastic syndromes
Source: PubMed Central journal article supplement — Haematologica. 2018 Oct 4;104(3):497–504. doi: 10.3324/haematol.2018.203158 (PMC6395339; doi:10.3324/haematol.2018.203158), 2019-03

## Dyserythropoiesis evaluated by the RED score and hepcidin:ferritin ratio predicts response to erythropoietin in lower-risk myelodysplastic syndromes

Sophie Park,<sup>1,2</sup> Olivier Kosmider,<sup>3</sup> Frédéric Maloisel,<sup>4</sup> Bernard Drenou,<sup>5</sup> Nicolas Chapuis,<sup>6</sup> Thibaud Lefebvre,<sup>7</sup> Zoubida Karim,<sup>6</sup> Hervé Puy,<sup>6</sup> Anne Sophie Alary,<sup>3</sup> Sarah Ducamp,<sup>7</sup> Frédérique Verdier,<sup>7</sup> Cécile Bouilloux,<sup>1,2</sup> Alice Rousseau,<sup>7</sup> Marie-Christine Jacob,<sup>8</sup> Agathe Debliquis,<sup>9</sup> Agnes Charpentier,<sup>10</sup> Emmanuel Gyan,<sup>11</sup> Bruno Anglaret,<sup>12</sup> Cecile Leyronnas,<sup>13</sup> Selim Corm,<sup>14</sup> Borhane Slama,<sup>15</sup> Stephane Cheze,<sup>16</sup> Kamel Laribi,<sup>17</sup> Shanti Amé,<sup>18</sup> Christian Rose,<sup>19</sup> Florence Lachenal,<sup>20</sup> Andrea Toma,<sup>21</sup> Gian Matteo Pica,<sup>22</sup> Martin Carre,<sup>1,2</sup> Frédéric Garban,<sup>1,2</sup> Clara Mariette,<sup>1,2</sup> Jean-Yves Cahn,<sup>1,2</sup> Mathieu Meunier,<sup>1,2</sup> Olivier Herault,<sup>23</sup> Pierre Fenaux,<sup>24</sup> Orianne Wagner-Ballon,<sup>25</sup> Valerie Bardet,<sup>26</sup> Francois Dreyfus<sup>27</sup> and Michaela Fontenay<sup>3</sup>

<sup>1</sup>Department of Hematology, CHU Grenoble-Alpes, Grenoble; <sup>2</sup>Institute for Advanced Biosciences, INSERM U1209, CNRS UMR 5309, Grenoble; <sup>3</sup>Assistance Publique-Hôpitaux de Paris (AP-HP), Service d'Hématologie Biologique, Hôpitaux Universitaires Paris Centre, Institut Cochin, Université Paris Descartes; <sup>4</sup>SOL Hematology, Clinique Saint Anne, Strasbourg; <sup>5</sup>Department of Hematology, Hôpital Emile Muller, CH de Mulhouse; <sup>6</sup>INSERM UMR1149, CNRS 8252 - Centre de Recherche sur l'Inflammation (CRI) Equipe "Hème, Fer et Pathologies Inflammatoires", Labex GREX, Centre Français des Porphyrines - Hôpital Louis Mourier HUPNVS, Paris; <sup>7</sup>Institut Cochin, INSERM U1016, CNRS UMR 8104, Paris Descartes University; <sup>8</sup>Institut de Biologie et Pathologie, Immunology, CHU Grenoble-Alpes, Grenoble; <sup>9</sup>Hematology Laboratory, Mulhouse Hospital; <sup>10</sup>Department of Hematology, Hôpital St Philibert, Lille; <sup>11</sup>Department of Hematology, CHU de Tours; <sup>12</sup>CH de Valence; <sup>13</sup>Institut Daniel Hollard, Grenoble; <sup>14</sup>Medipole de Savoie, Challes les Eaux; <sup>15</sup>Department of Hematology, CH d'Avignon; <sup>16</sup>Department of Hematology, CHU Caen; <sup>17</sup>Department of Hematology, CH Le Mans; <sup>18</sup>Department of Hematology, Hôpital Civil, CHU Strasbourg; <sup>19</sup>Department of Hematology, Hôpital Saint Vincent de Paul, Lille; <sup>20</sup>Department of Hematology CH Pierre Oudot, Bourgoin-Jallieu; <sup>21</sup>Department of Hematology, Hôpital Universitaire Henri Mondor, AP-HP, Université Paris 12, Créteil; <sup>22</sup>Department of Hematology, CH Métropole Savoie, Chambéry; <sup>23</sup>Laboratoire d'Hématologie, CHU Tours; <sup>24</sup>Department of Hematology, Saint Louis Hospital, AP-HP, Université Paris Diderot; <sup>25</sup>Département d'Hématologie et Immunologie Biologiques, Hôpital Universitaire Henri Mondor, Creteil; <sup>26</sup>Service d'Hématologie Immunologie Transfusion, Hôpitaux Universitaires Paris Ile de France-Ouest, AP-HP and <sup>27</sup>Department of Hematology, Cochin Hospital, Paris V, France

©2019 Ferrata Storti Foundation. This is an open-access paper. doi:10.3324/haematol.2018.203158

Received: July 27, 2018.

Accepted: October 2, 2018.

Pre-published: October 4, 2018.

Correspondence: SOPHIE PARK

spark@chu-grenoble.fr

Supplemental figures

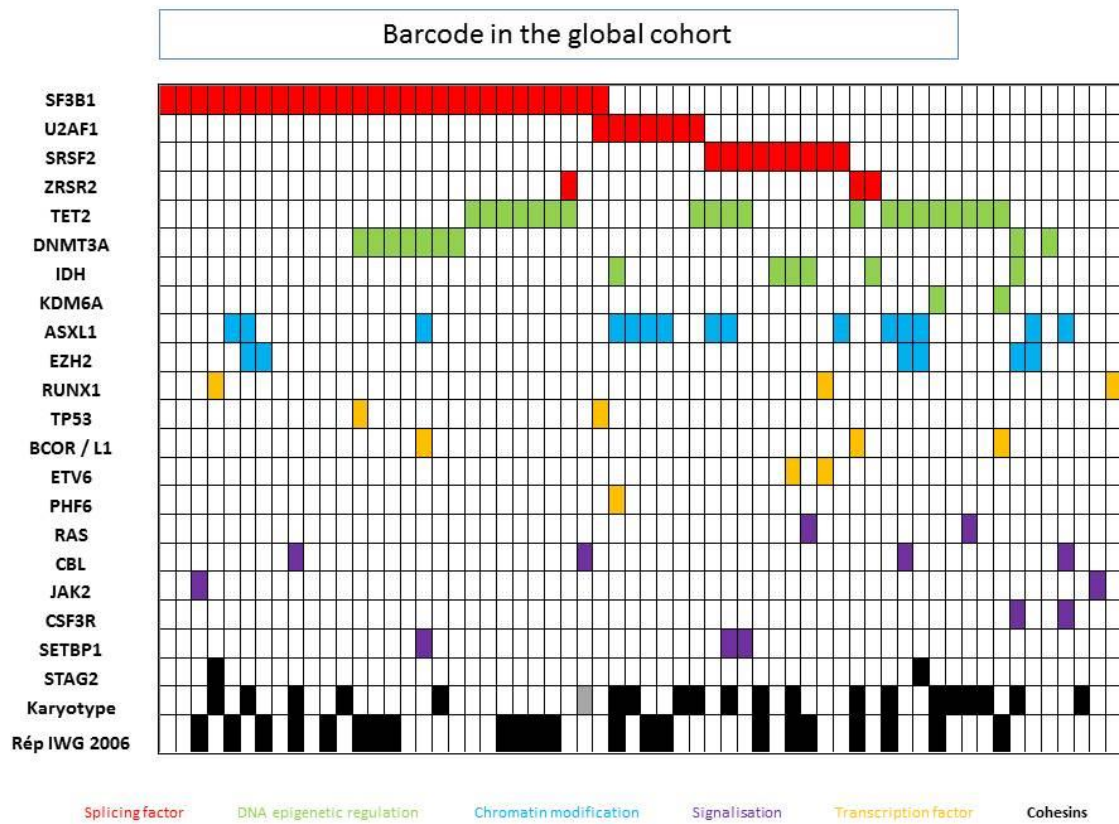

**Sup Figure 1.** Barcode representation of the genetic lesions associations. Each column represents an individual sample and each line represents a gene.

Karyotype: white: normal, black: abnormal; grey:NA

IWG 2006: white: no, black: yes

**Sup Figure 2.**

GDF-15 according to WHO classification (2008)

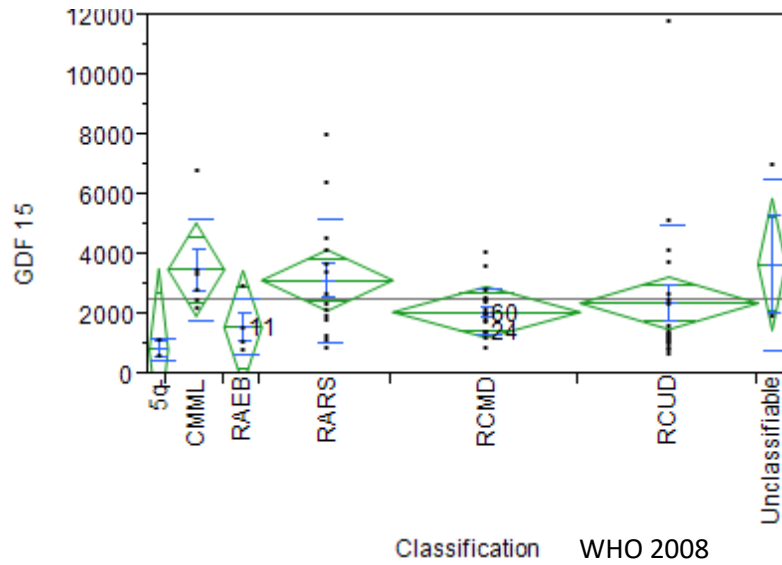

P=0.02, Wilcoxon test

Ratio hepcidin/ferritin according to WHO classification (2008)

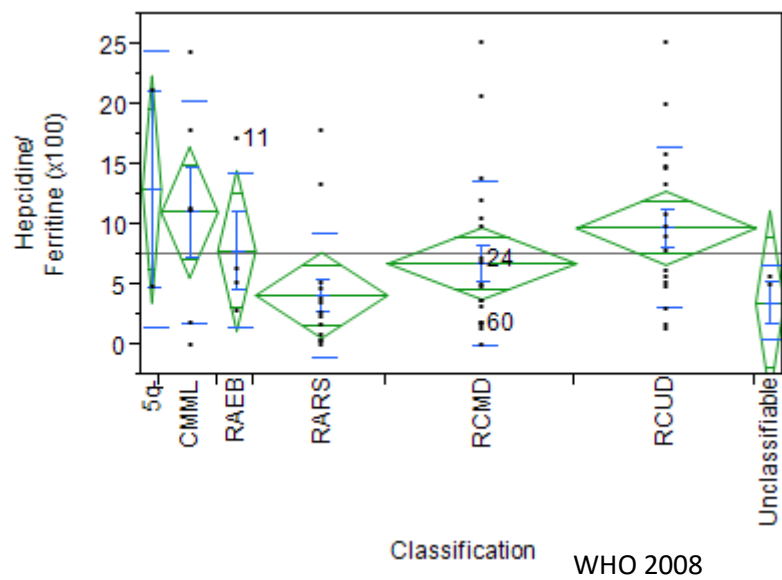

P=0.11

Sup Figure 3. Correlation between hepcidin/ferritin levels and GDF-15 in myelodysplastic syndrome patients treated with epoetin zeta. R2= 0.043 and p=0.04. There is an inverse correlation between GDF-15 and hepcidin/ferritin levels.

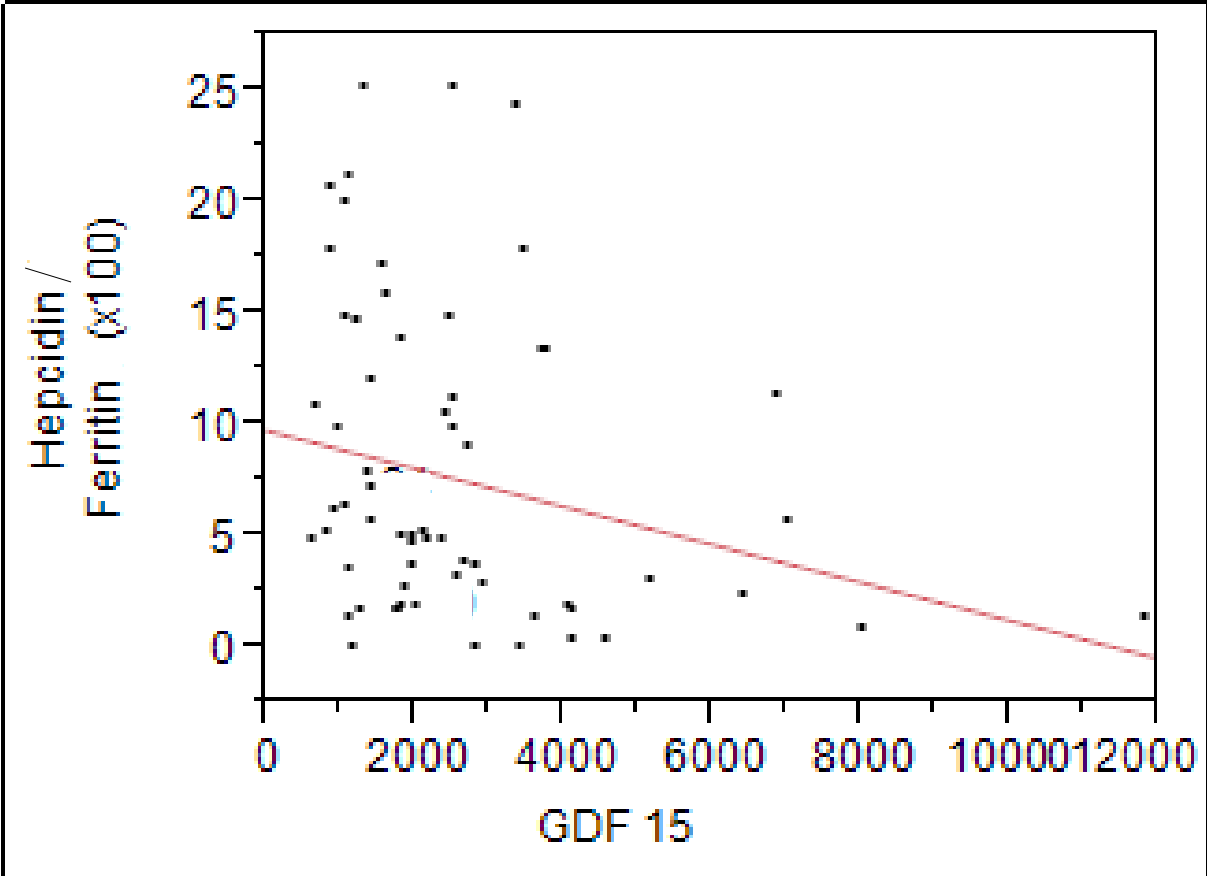

$$\text{Hepcidine/ferritin} \times 100 = 9.74248 - 0.0008534 \times \text{GDF15}$$

P=0.04

R2 adjusted=0.043

Supplemental figures 4. ROC curves.

**Sup Figure 4A.** ROC curve for hepcidin/ferritin ratio. Area under the curve : 0.627. The best value of hepcidin/ferritin ratio for Sensitivity 53% and Specificity 79% is 9.

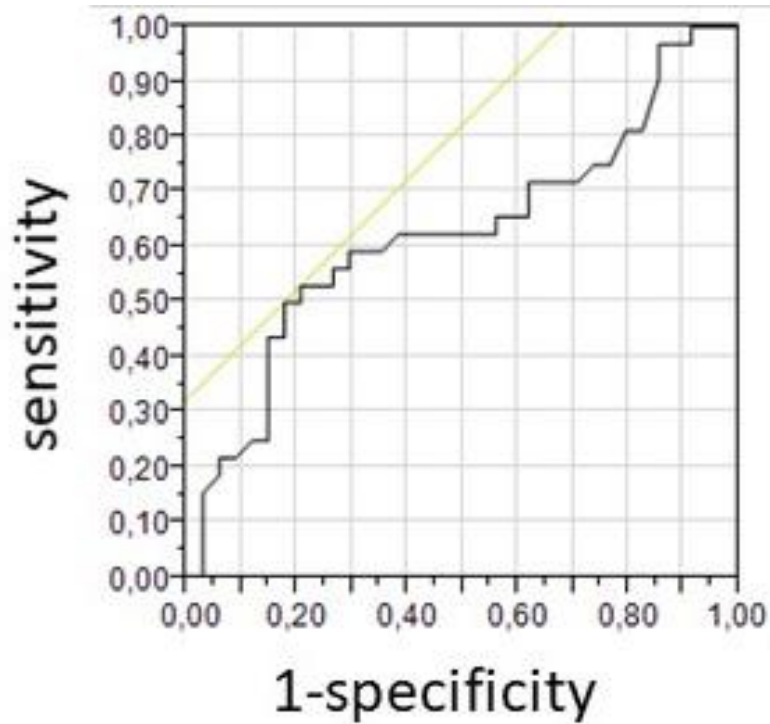

**Sup Figure 4B.** ROC curve for the Red score. Area under the curve : 0.645. The best value of the Red score for Sensitivity 37.5% and Specificity 89% is 4.

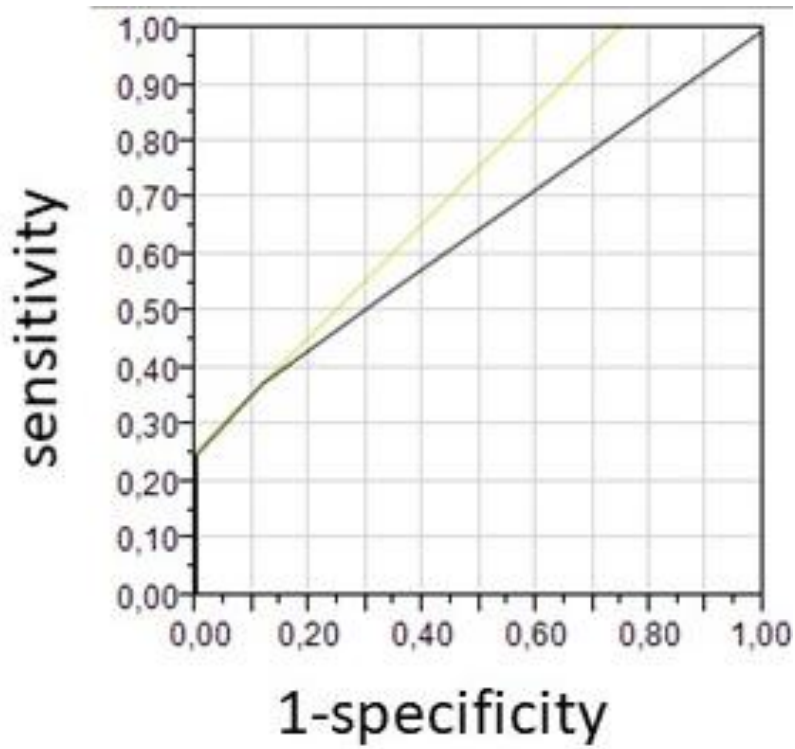

**Sup Figure 4C.** ROC curve for GDF-15. Area under the curve : 0.56. The best value of GDF-15 for Sensitivity 65.6% and Specificity 59% is 2000 pg/ml.

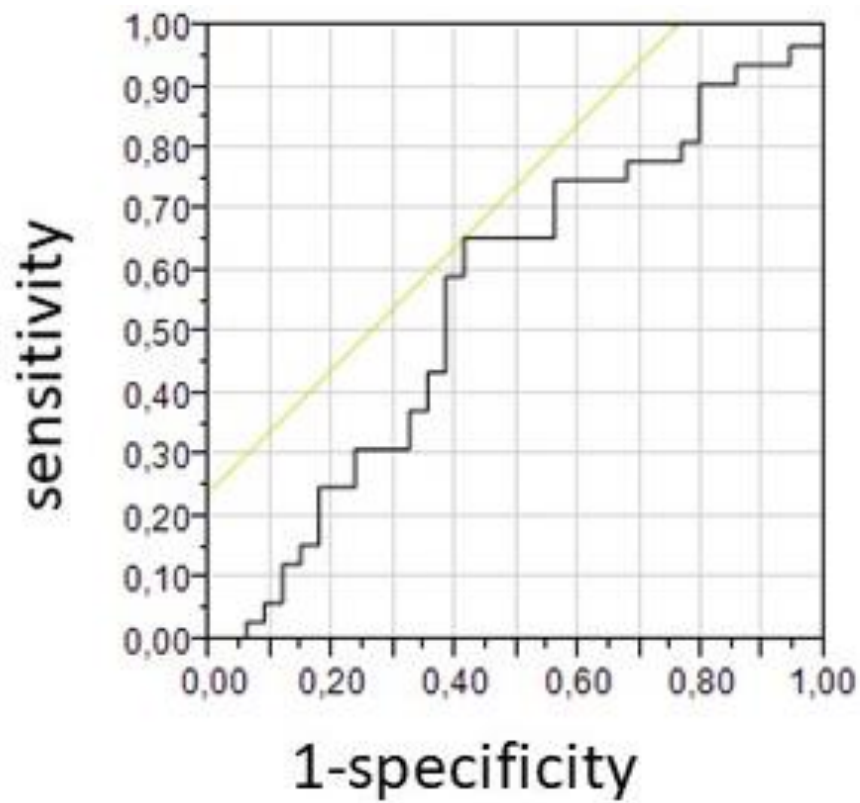

Supplement: 2018.203158.PARK_SUPPL.pdf [file 2018.203158.PARK_SUPPL.pdf]
